# Supplementary material for: Structural Refinement of Carbimazole by NMR Crystallography
Source: MDPI journal article supplement (doi:10.3390/molecules26154577), 2021-07-29
Supplement: s1 [file s1]

## Supplementary Materials

# Structural refinement of carbimazole by NMR crystallography

Andrea Scarperi, Giovanni Barcaro, Aleksandra Pajzderska, Francesca Martini, Elisa Carignani\*, Marco Geppi\*

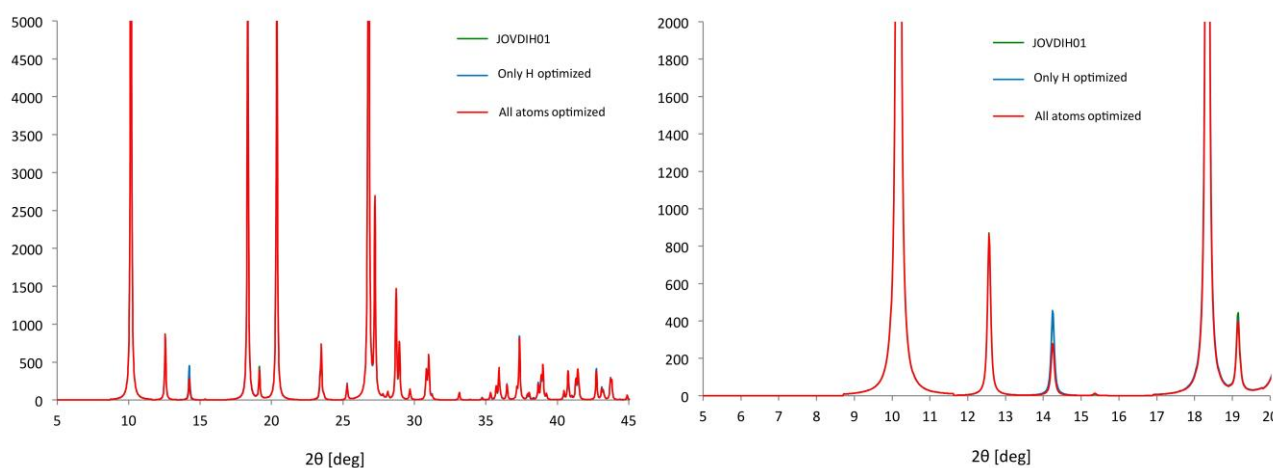

**Figure S1.** Simulated XRPD spectra from JOVDIH01 [1] (green) and two levels of structural optimization: only H (blue) and full optimization (red).

**Table S1.** Root mean square deviations (RMSD) of atoms positions of the optimized structures with respect to the SCXR crystal structures of carbimazole JOVDIH01 [1] and JOVDIH [2]. A careful analysis did not highlight any particular hydrogen atom changing more than the others after optimization.

| Atom type<br>(quantity in<br>minimal unit) | RMSD DFT-Exp<br>Only H<br>optimized<br>(Angstrom)<br>JOVDIH01 | RMSD DFT-Exp<br>Only H<br>optimized<br>(Angstrom)<br>JOVDIH | RMSD DFT-Exp<br>All atoms<br>optimized<br>(Angstrom)<br>JOVDIH01 | RMSD DFT-Exp<br>All atoms<br>optimized<br>(Angstrom)<br>JOVDIH |
|--------------------------------------------|---------------------------------------------------------------|-------------------------------------------------------------|------------------------------------------------------------------|----------------------------------------------------------------|
| C (7)                                      | 0.00                                                          | 0.00                                                        | 0.04                                                             | 0.06                                                           |
| N (2)                                      | 0.00                                                          | 0.00                                                        | 0.03                                                             | 0.05                                                           |
| S (1)                                      | 0.00                                                          | 0.00                                                        | 0.02                                                             | 0.00                                                           |
| O (2)                                      | 0.00                                                          | 0.00                                                        | 0.04                                                             | 0.04                                                           |
| H (10)                                     | 0.09                                                          | 0.05                                                        | 0.14                                                             | 0.13                                                           |

### References

1. Das, D.; Roy, G.; Mugesh, G. Antithyroid Drug Carbimazole and Its Analogues: Synthesis and Inhibition of Peroxidase-Catalyzed Iodination of L-Tyrosine. *J. Med. Chem.* **2008**, *51*, 7313–7317, doi:10.1021/jm800894m.
2. Delage, C.; Faure, F.; Leger, J.M.; Raby, C.; Goursolle, M. Conformational study of 3-methyl 2-thio imidazoline ethyl 1-carboxylate. *C. R. Acad. Sci. Paris* **1990**, *311*, 781–784.
